# Supplementary material
Source: PubMed Central journal article supplement (PMC7107456)
Supplement: jiz531_suppl_supplementary_figure_s1.pdf [file jiz531_suppl_supplementary_figure_s1.pdf]

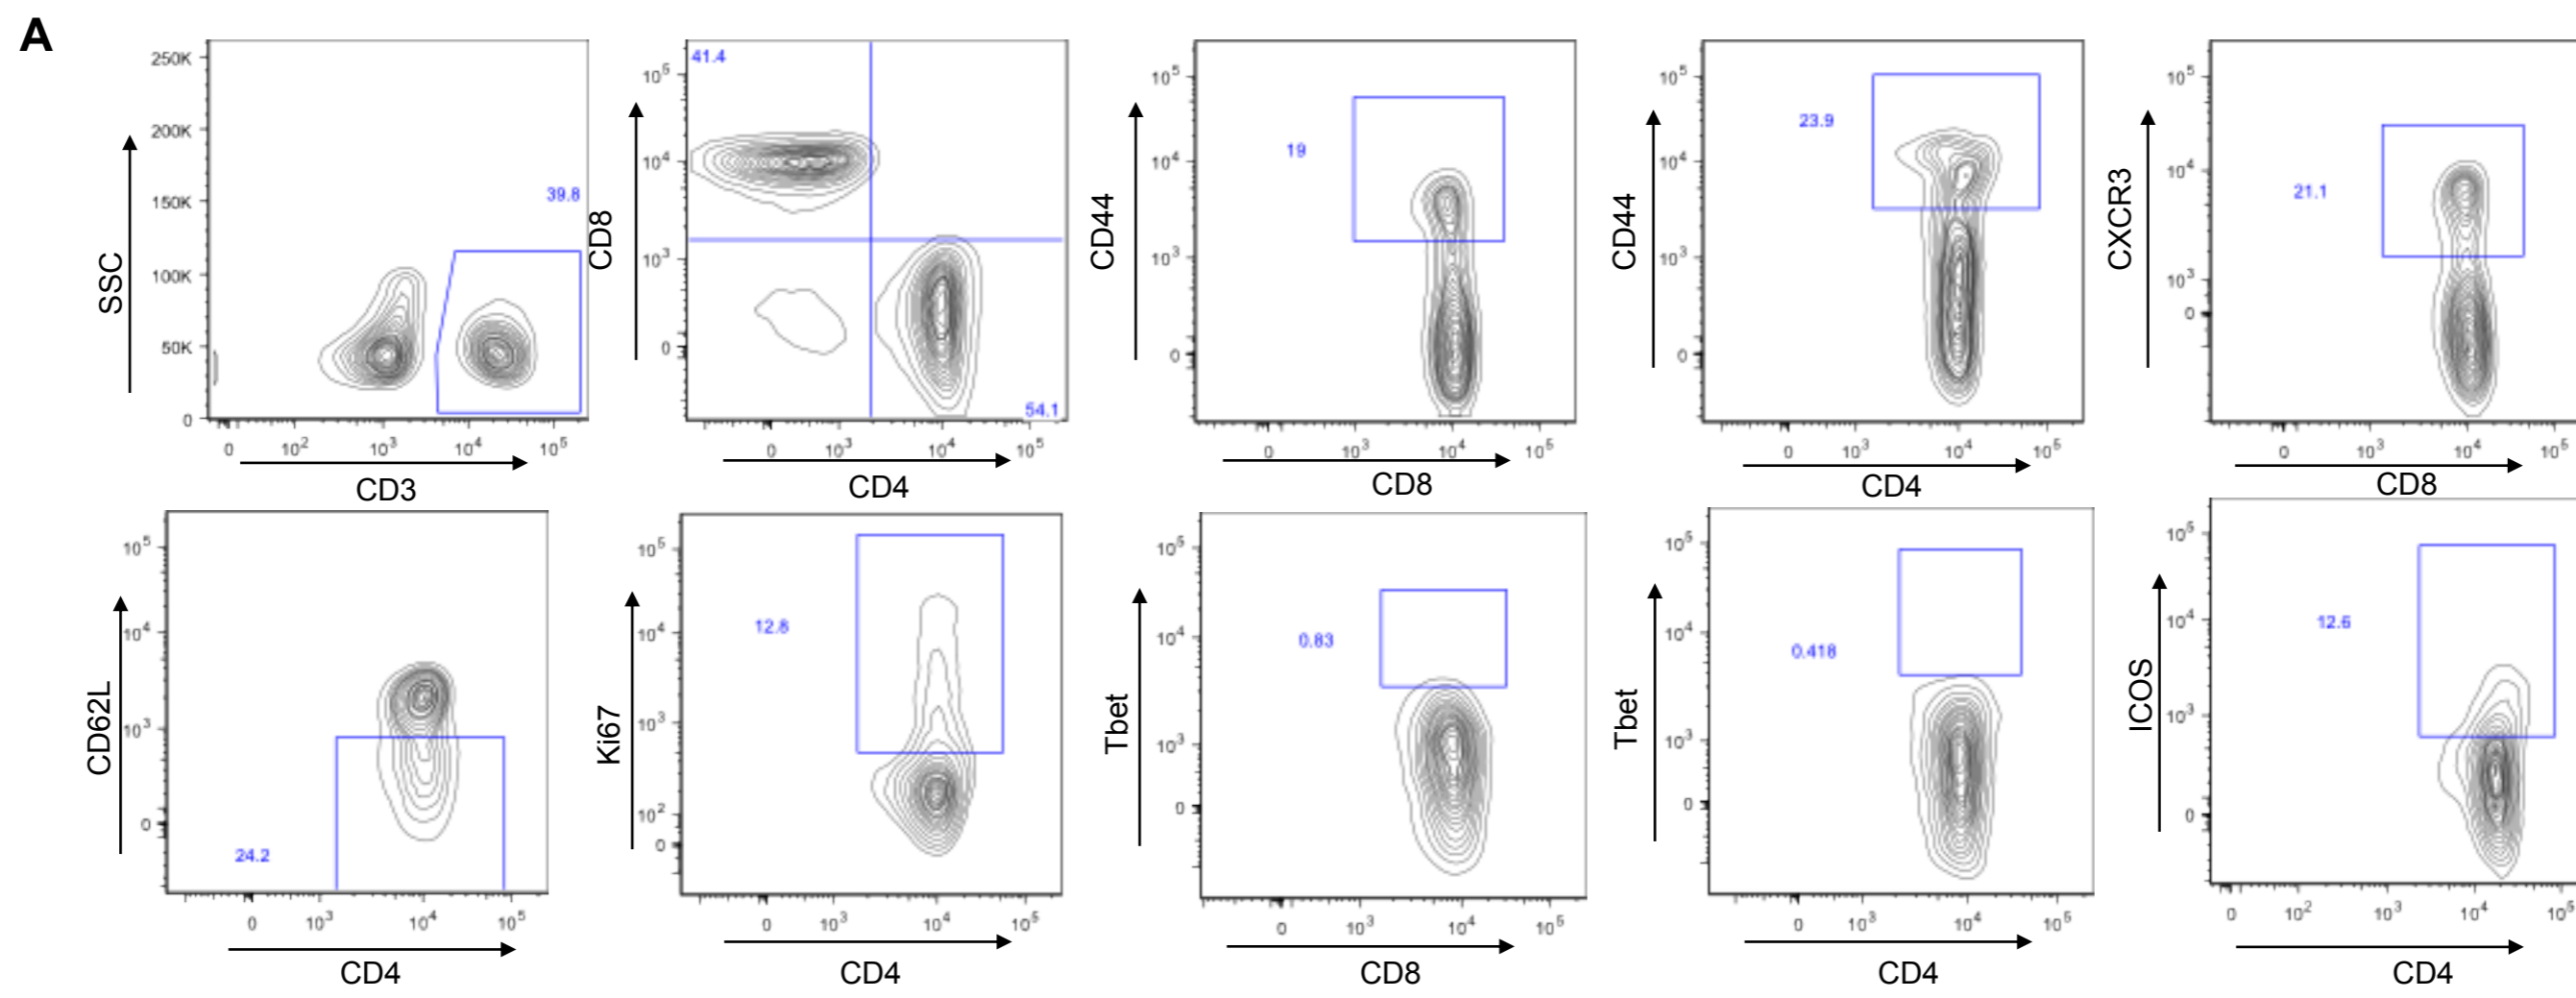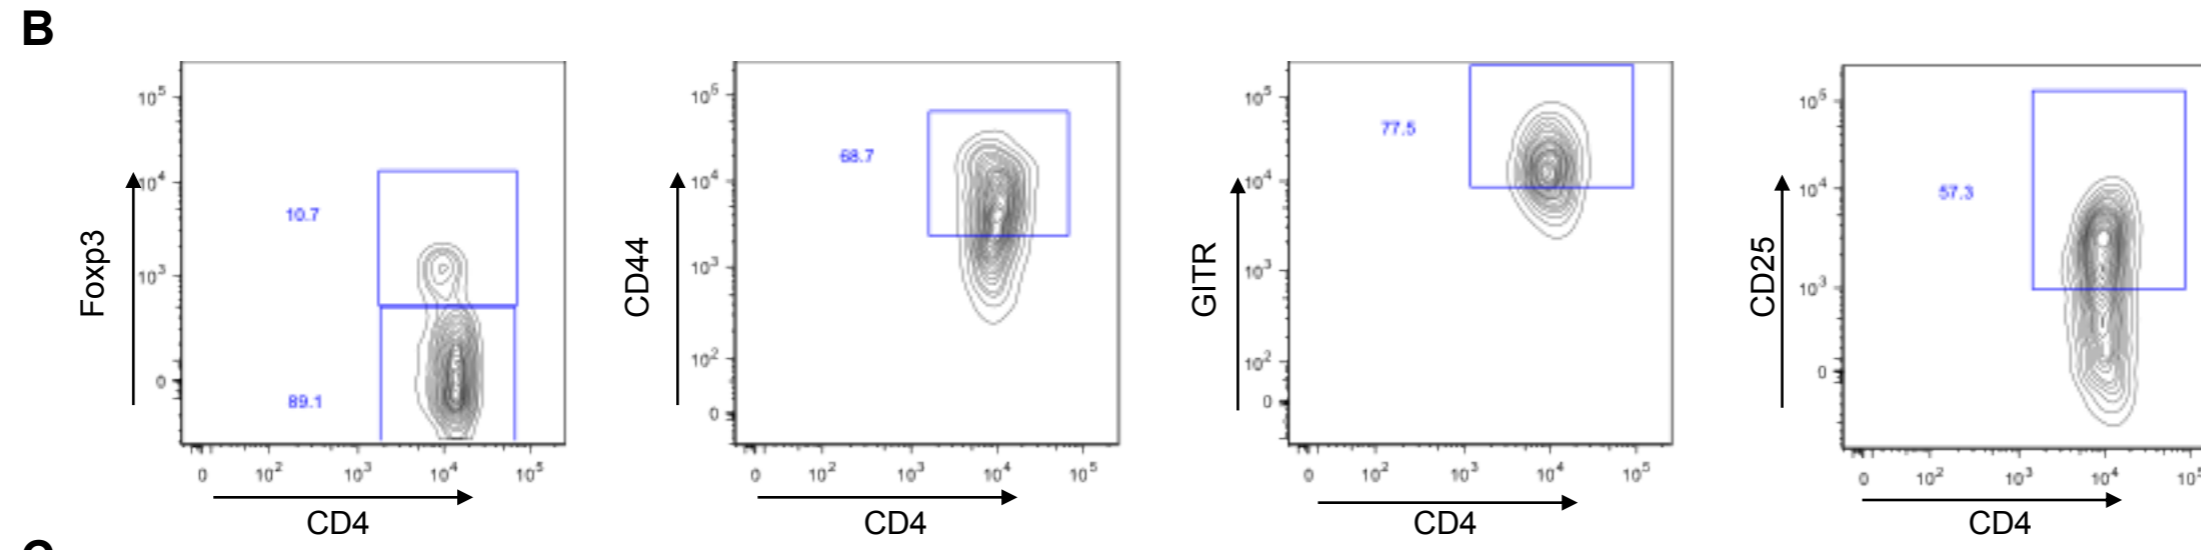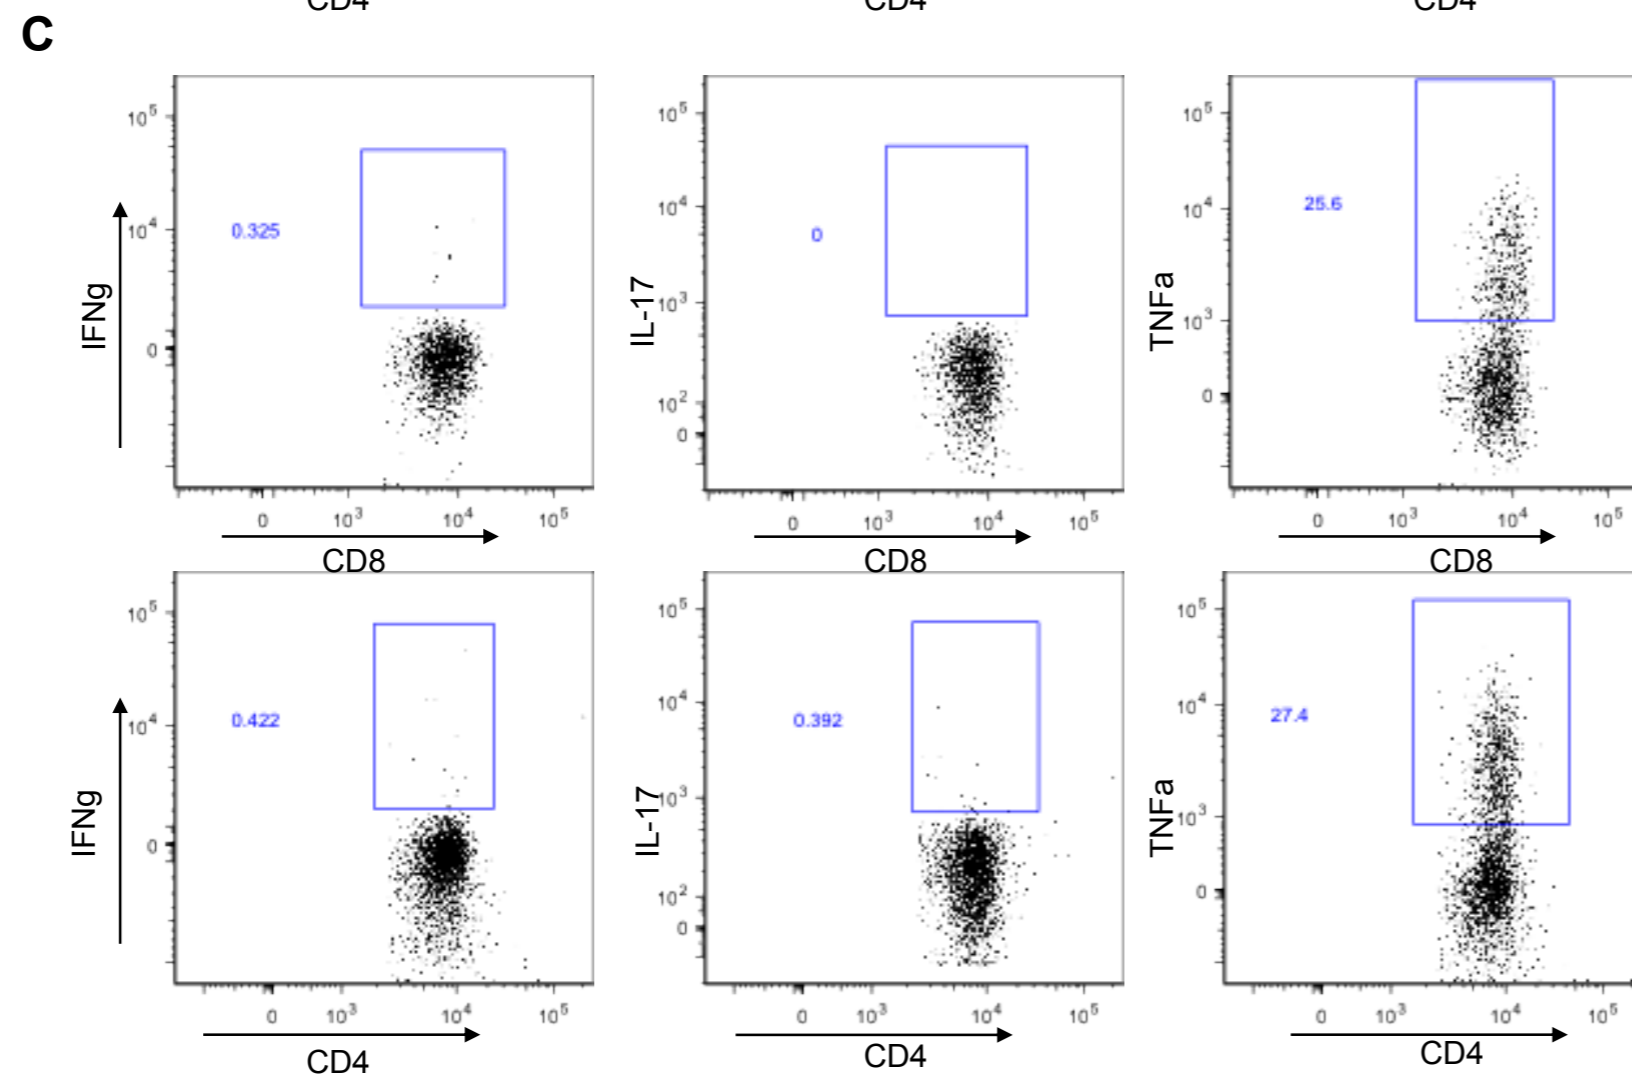

Supplemental Figure 1. Representative staining of each phenotype in the study. From Figure 1 (A), cells are first gated for singlets, live, lymphocytes, and then total CD3+ to identify CD4+ and CD8+ cells, and then frequencies in subsequent panels are % of CD4+ or CD8+ cells. From Figure 2 (B), cells are first gated for singlets, live, lymphocytes, and total CD4+ before gating Tregs as CD4+ Foxp3+. From the Treg gate, freq of cells that are CD44+, GITR+, or CD25+ are shown. From Figure 3 (C), cells are again gated for singlets, live, lymphocytes, and then total CD3+ to identify CD4+ and CD8+ cells. Top row of C identifies CD8+ cells, and bottom row CD4+ cells, that are IFNγ+, IL-17+, or TNFα+ cells.
